# Supplementary material
Source: publisher figshare collection journal article supplement (https://rs.figshare.com/ndownloader/files/13209089)
Supplement: Supplementary file 1 [file 13209089]

## Sheet: Sheet1
			Supplementary Table S1 for: S.V. Drovetski, I.V. Fadeev, M. Raković, R.J. Lopes, G. Boano, M. Pavia, E.A. Koblik, Y.V. Lohman, Y.A. Red’kin, S.A. Aghayan, S. Reis, S.S. Drovetskaya, and G. Voelker.A test of the European Pleistocene Refugial Paradigm, using a Western Palearctic endemic bird species
			DOI: 10.1098/rspb.2018.1606
	Sample ID	Institution Voucher	Species	Sex	Date	Lat	Lon	Country	00132	09963	13336	14657	15463	16532	ACL	ACO1I9	ND2	RHOI1	TGFB	Reference
Iberia	A251869	CIBIO none	Prunella modularis	M	2011-03-04	41.3207	-8.7302	Portugal	MH783535, MH783536	MH783647, MH783648	MH783759, MH783760	MH783871, MH783872	MH783425, MH783426	MH783983, MH783984	MH784091, MH784092	MH783195, MH783196	MH778323	MH784203, MH784204	MH784313, MH784314
Iberia	A285808	CIBIO none	Prunella modularis	U	2009-10-26	41.31	-8.73	Portugal	MH783541, MH783542	MH783653, MH783654	MH783765, MH783766	MH783877, MH783878	MH783431, MH783432	MH783989, MH783990	MH784097, MH784098		MH778326	MH784209, MH784210	MH784319, MH784320
Iberia	A285821	CIBIO none	Prunella modularis	M	2010-01-23	41.31	-8.73	Portugal	MH783545, MH783546	MH783657, MH783658	MH783769, MH783770	MH783881, MH783882	MH783435, MH783436	MH783993, MH783994	MH784101, MH784102	MH783201, MH783202	MH778328	MH784213, MH784214	MH784323, MH784324
Iberia	A285828	CIBIO none	Prunella modularis	F	2010-03-16	41.34	-8.73	Portugal	MH783547, MH783548	MH783659, MH783660	MH783771, MH783772	MH783883, MH783884	MH783437, MH783438	MH783995, MH783996	MH784103, MH784104	MH783203	MH778329	MH784215, MH784216	MH784325, MH784326
Iberia	A285829	CIBIO none	Prunella modularis	M	2010-03-16	41.34	-8.73	Portugal	MH783549, MH783550	MH783661, MH783662	MH783773, MH783774	MH783885, MH783886	MH783439, MH783440	MH783997, MH783998	MH784105, MH784106	MH783204, MH783205	MH778330	MH784217, MH784218	MH784327, MH784328
Iberia	A285803	CIBIO none	Prunella modularis	M	2009-08-13	41.3056	-8.72989	Portugal	MH783539, MH783540	MH783651, MH783652	MH783763, MH783764	MH783875, MH783876	MH783429, MH783430	MH783987, MH783988	MH784095, MH784096	MH783198, MH783199	MH778325	MH784207, MH784208	MH784317, MH784318
Iberia	A285812	CIBIO none	Prunella modularis	U	2009-11-30	41.3056	-8.72989	Portugal	MH783543, MH783544	MH783655, MH783656	MH783767, MH783768	MH783879, MH783880	MH783433, MH783434	MH783991, MH783992	MH784099, MH784100	MH783200	MH778327	MH784211, MH784212	MH784321, MH784322
Iberia	A255158	CIBIO none	Prunella modularis	F		41.1	-8.56	Portugal	MH783537, MH783538	MH783649, MH783650	MH783761, MH783762	MH783873, MH783874	MH783427, MH783428	MH783985, MH783986	MH784093, MH784094	MH783197	MH778324	MH784205, MH784206	MH784315, MH784316
Iberia	A327690	CIBIO none	Prunella modularis	U	2012-07-08	40.09	-7.86	Portugal	MH783559, MH783560	MH783671, MH783672	MH783783, MH783784	MH783895, MH783896	MH783449, MH783450	MH784007, MH784008	MH784115, MH784116	MH783212	MH778335	MH784227, MH784228	MH784337, MH784338
Iberia	A324109	CIBIO none	Prunella modularis	F	2012-06-28	41.82	-7.784	Portugal	MH783551, MH783552	MH783663, MH783664	MH783775, MH783776	MH783887, MH783888	MH783441, MH783442	MH783999, MH784000	MH784107, MH784108	MH783206	MH778331	MH784219, MH784220	MH784329, MH784330
Iberia	A324112	CIBIO none	Prunella modularis	M	2012-06-28	41.82	-7.784	Portugal	MH783553, MH783554	MH783665, MH783666	MH783777, MH783778	MH783889, MH783890	MH783443, MH783444	MH784001, MH784002	MH784109, MH784110	MH783207, MH783208	MH778332	MH784221, MH784222	MH784331, MH784332
Iberia	A324115	CIBIO none	Prunella modularis	F	2012-06-29	41.7916	-7.75033	Portugal	MH783555, MH783556	MH783667, MH783668	MH783779, MH783780	MH783891, MH783892	MH783445, MH783446	MH784003, MH784004	MH784111, MH784112	MH783209	MH778333	MH784223, MH784224	MH784333, MH784334
Iberia	A324122	CIBIO none	Prunella modularis	M	2012-06-29	41.7916	-7.75033	Portugal	MH783557, MH783558	MH783669, MH783670	MH783781, MH783782	MH783893, MH783894	MH783447, MH783448	MH784005, MH784006	MH784113, MH784114	MH783210, MH783211	MH778334	MH784225, MH784226	MH784335, MH784336
Italy	B1331	MCCI B-1331	Prunella modularis	U	pullus	44.97	6.93	Italy								KC759206	KC759276
Italy	B3551	MCCI B-3551	Prunella modularis	M	2111-08-20	44.3208	6.98139	Italy								MH783213, MH783214	MH778336
Italy	I2016270	TCWC none	Prunella modularis	M	2016-06-04	45.192	7.3125	Italy	MH783561, MH783562	MH783673, MH783674	MH783785, MH783786	MH783897, MH783898	MH783451, MH783452	MH784009, MH784010	MH784117, MH784118	MH783240, MH783241	MH778353	MH784229, MH784230	MH784339, MH784340
Italy	I2016273	TCWC none	Prunella modularis	U	2016-06-04	45.192	7.3125	Italy	MH783563, MH783564	MH783675, MH783676	MH783787, MH783788	MH783899, MH783900	MH783453, MH783454	MH784011, MH784012	MH784119, MH784120	MH783242	MH778354	MH784231, MH784232	MH784341, MH784342
Italy	I2016275	TCWC none	Prunella modularis	U	2016-06-05	45.192	7.3125	Italy	MH783565, MH783566	MH783677, MH783678	MH783789, MH783790	MH783901, MH783902	MH783455, MH783456	MH784013, MH784014	MH784121, MH784122	MH783243	MH778355	MH784233, MH784234	MH784343, MH784344
Italy	I2016277	TCWC none	Prunella modularis	M	2016-06-05	45.192	7.3125	Italy	MH783567, MH783568	MH783679, MH783680	MH783791, MH783792	MH783903, MH783904	MH783457, MH783458	MH784015, MH784016	MH784123, MH784124	MH783244, MH783245	MH778356	MH784235, MH784236	MH784345, MH784346
Italy	I2016287	TCWC none	Prunella modularis	M	2016-06-05	45.192	7.3125	Italy	MH783569, MH783570	MH783681, MH783682	MH783793, MH783794	MH783905, MH783906	MH783459, MH783460	MH784017, MH784018	MH784125, MH784126	MH783246, MH783247	MH778357	MH784237, MH784238	MH784347, MH784348
Italy	JAH094	TCWC none	Prunella modularis	M	2015-07-15	45.192	7.3125	Italy	MH783571, MH783572	MH783683, MH783684	MH783795, MH783796	MH783907, MH783908	MH783461, MH783462	MH784019, MH784020	MH784127, MH784128	MH783270, MH783271	MH778369	MH784239, MH784240	MH784349, MH784350
Italy	JAH096	TCWC none	Prunella modularis	U	2015-07-15	45.192	7.3125	Italy	MH783573, MH783574	MH783685, MH783686	MH783797, MH783798	MH783909, MH783910	MH783463, MH783464	MH784021, MH784022	MH784129, MH784130	MH783272	MH778370	MH784241, MH784242	MH784351, MH784352
Italy	JAH102	TCWC none	Prunella modularis	M	2015-07-16	45.192	7.3125	Italy	MH783575, MH783576	MH783687, MH783688	MH783799, MH783800	MH783911, MH783912	MH783465, MH783466	MH784023, MH784024	MH784131, MH784132	MH783273, MH783274	MH778371	MH784243, MH784244	MH784353, MH784354
Italy	JAH115	TCWC none	Prunella modularis	U	2015-07-16	45.192	7.3125	Italy	MH783577, MH783578	MH783689, MH783690	MH783801, MH783802	MH783913, MH783914	MH783467, MH783468	MH784025, MH784026	MH784133, MH784134	MH783275	MH778372	MH784245, MH784246	MH784355, MH784356
Italy	JAH129	TCWC none	Prunella modularis	M	2015-07-16	45.192	7.3125	Italy	MH783579, MH783580	MH783691, MH783692	MH783803, MH783804	MH783915, MH783916	MH783469, MH783470	MH784027, MH784028	MH784135, MH784136	MH783276, MH783277	MH778373	MH784247, MH784248	MH784357, MH784358
Balkans	MR0565	MNHB	Prunella modularis	M	2009-06-11	43.1935	19.0883	Montenegro	MH783487, MH783488	MH783597, MH783598	MH783709, MH783710	MH783821, MH783822	MH783375, MH783376	MH783933, MH783934	MH784045, MH784046	MH783297, MH783298	MH778387	MH784153, MH784154	MH784263, MH784264
Balkans	MR0566	MNHB	Prunella modularis	F	2009-06-11	43.1935	19.0883	Montenegro		MH783599, MH783600	MH783711, MH783712	MH783823, MH783824	MH783377, MH783378	MH783935, MH783936	MH784047, MH784048	MH783299	MH778388	MH784155, MH784156	MH784265, MH784266
Balkans	MR0556	MNHB	Prunella modularis	M	2009-06-19	43.34	20.8477	Serbia								MH783289, MH783290	MH778383
Balkans	MR0557	MNHB	Prunella modularis	M	2009-06-20	43.339	20.8477	Serbia	MH783483, MH783484	MH783593, MH783594	MH783705, MH783706	MH783817, MH783818	MH783371, MH783372	MH783929, MH783930	MH784041, MH784042	MH783291, MH783292	MH778384	MH784149, MH784150	MH784259, MH784260
Balkans	MR0560	MNHB	Prunella modularis	M	2009-06-20	43.339	20.8477	Serbia	MH783485, MH783486	MH783595, MH783596	MH783707, MH783708	MH783819, MH783820	MH783373, MH783374	MH783931, MH783932	MH784043, MH784044	MH783293, MH783294	MH778385	MH784151, MH784152	MH784261, MH784262
Balkans	MR0561	MNHB	Prunella modularis	M	2009-06-20	43.339	20.8477	Serbia								MH783295, MH783296	MH778386
Balkans	F6296	YPM 84385	Prunella modularis	M	2008-05-20	43.38	22.63	Serbia									MH778349
Balkans	F6298	YPM 84390	Prunella modularis	F	2008-05-20	43.38	22.63	Serbia	MH783479, MH783480	MH783589, MH783590	MH783701, MH783702	MH783813, MH783814	MH783367, MH783368	MH783925, MH783926	MH784037, MH784038	MH783235	MH778350	MH784145, MH784146	MH784255, MH784256
Balkans	F6299	YPM 84391	Prunella modularis	M	2008-05-20	43.38	22.63	Serbia								MH783236, MH783237	MH778351
Balkans	F6303	YPM 84400	Prunella modularis	M	2008-05-21	43.38	22.63	Serbia								MH783238, MH783239	MH778352
Balkans	MR0354	MNHB	Prunella modularis	F	2008-05-19	43.38	22.63	Serbia	MH783481, MH783482	MH783591, MH783592	MH783703, MH783704	MH783815, MH783816	MH783369, MH783370	MH783927, MH783928	MH784039, MH784040	KC759244	KC759300	MH784147, MH784148	MH784257, MH784258
Balkans	MR0358	MNHB	Prunella modularis	M	2008-05-20	43.38	22.63	Serbia								MH783283, MH783284	MH778380
Balkans	MR0359	MNHB	Prunella modularis	M	2008-05-20	43.38	22.63	Serbia								MH783285, MH783286	MH778381
Balkans	MR0366	MNHB	Prunella modularis	M	2008-05-20	43.38	22.63	Serbia								MH783287, MH783288	MH778382
Balkans	MR0567	MNHB	Prunella modularis	M	2008-05-22	43.38	22.63	Serbia								MH783300, MH783301	MH778389
Balkans	MR0568	MNHB	Prunella modularis	M	2008-05-22	43.38	22.63	Serbia	MH783489, MH783490	MH783601, MH783602	MH783713, MH783714	MH783825, MH783826	MH783379, MH783380	MH783937, MH783938	MH784049, MH784050	MH783302, MH783303	MH778390	MH784157, MH784158	MH784267, MH784268
Balkans	MR0569	MNHB	Prunella modularis	M	2008-05-22	43.38	22.63	Serbia								MH783304, MH783305	MH778391
Balkans	BKS7036	USNM 637507	Prunella modularis	F	2006-05-31	41.4808	24.325	Greece								KC759208	KC759278
Balkans	BKS7038	USNM 637509	Prunella modularis	M	2006-05-31	41.4808	24.325	Greece								MH783217, MH783218	MH778338
Balkans	BKS7053	USNM 637524	Prunella modularis	M	2006-06-03	41.4808	24.325	Greece									MH778339
Balkans	MR0063	USNM 640157	Prunella modularis	M	2006-05-31	41.4808	24.325	Greece								MH783281, MH783282	MH778379
Balkans	SVD3759	USNM 640847	Prunella modularis	M	2006-05-29	41.4808	24.325	Greece									MH778419
Balkans	SVD3774	USNM 640862	Prunella modularis	F	2006-05-31	41.4808	24.325	Greece								MH783346	MH778420
Balkans	BKS7032	USNM 637503	Prunella modularis	M	2006-05-30	41.48	24.33	Greece								MH783215, MH783216	MH778337
Balkans	MR1142	MNHB	Prunella modularis	M	2012-05-26	41.48	24.33	Greece	MH783491, MH783492	MH783603, MH783604	MH783715, MH783716	MH783827, MH783828	MH783381, MH783382	MH783939, MH783940	MH784051, MH784052	MH783321, MH783322	MH778401	MH784159, MH784160	MH784269, MH784270
Balkans	MR1173	MNHB	Prunella modularis	M	2012-05-28	41.48	24.33	Greece	MH783493, MH783494	MH783605, MH783606	MH783717, MH783718	MH783829, MH783830	MH783383, MH783384	MH783941, MH783942	MH784053, MH784054	MH783323, MH783324	MH778402	MH784161, MH784162	MH784271, MH784272
Europe	ZMMU067A	ZMMU	Prunella modularis	M	2006-04-28	54.9	20.27	Russia								MH783356, MH783357	MH778320
Europe	ZMMU068A	ZMMU	Prunella modularis	F	2006-04-28	54.9	20.27	Russia								MH783358	MH778321
Europe	ZMMU132A	ZMMU	Prunella modularis	M	2006-05-01	54.9	20.27	Russia								MH783361, MH783362	MH778322
Europe	GVA021	ZMMU	Prunella modularis	M	2006-05-05	54.8962	20.2797	Russia	MH783515, MH783516	MH783627, MH783628	MH783739, MH783740	MH783851, MH783852	MH783405, MH783406	MH783963, MH783964	MH784075, MH784076	KC759223, KC759224	KC759288	MH784183, MH784184	MH784293, MH784294
Europe	MIM026	ZMMU	Prunella modularis	M	2006-04-26	54.8962	20.2797	Russia	MH783519, MH783520	MH783631, MH783632	MH783743, MH783744	MH783855, MH783856	MH783409, MH783410	MH783967, MH783968	MH784079, MH784080		MH778377	MH784187, MH784188	MH784297, MH784298
Europe	KOJ006	ZMMU	Prunella modularis	M	2007-07-13	56.5178	34.9386	Russia	MH783517, MH783518	MH783629, MH783630	MH783741, MH783742	MH783853, MH783854	MH783407, MH783408	MH783965, MH783966	MH784077, MH784078	MH783278, MH783279	MH778374	MH784185, MH784186	MH784295, MH784296
Europe	SKY296	ZMMU	Prunella modularis	M	2004-06-25	56.6743	36.4799	Russia	MH783523, MH783524	MH783635, MH783636	MH783747, MH783748	MH783859, MH783860	MH783413, MH783414	MH783971, MH783972	MH784081, MH784082	MH783341, MH783342	MH778411	MH784191, MH784192	MH784301, MH784302
Europe	MIM249	ZMMU	Prunella modularis	M	2010-04-16	55.73	37.05	Russia									MH778378
Europe	SKY180	ZMMU	Prunella modularis	M		55.5	37.55	Russia								MH783339, MH783340	MH778410
Europe	KDV005	ZMMU	Prunella modularis	F	2004-04-23	54.8353	37.7071	Russia								KC759239	KC759297
Europe	IUK0049	UWBM 61272	Prunella modularis	F	1997-08-29	55.9	37.9	Russia								MH783248	MH778358/KU859334
Europe	IUK0148	UWBM 83451	Prunella modularis	M	1998-05-02	55.9	37.9	Russia								MH783249, MH783250	KU859328
Europe	IUK0149	UWBM 61012	Prunella modularis	F	1998-05-02	55.9	37.9	Russia								MH783251	MH778359/KU859329
Europe	IUK0151	UWBM 61015	Prunella modularis	M	1998-04-27	55.9	37.9	Russia								MH783252, MH783253	KU859330
Europe	PAM003	ZMMU	Prunella modularis	M	2007-09-16	56.06	39.05	Russia								MH783335, MH783336	MH778408
Europe	MVK066	UWBM 74267	Prunella modularis	F	2001-09-13	58.4	50.43	Russia								MH783330	MH778406
Europe	MVK059	UWBM 74264	Prunella modularis	M	2001-09-13	58.4	50.4333	Russia								MH783325, MH783326	MH778403/KU859335
Europe	MVK060	UWBM 74450	Prunella modularis	U	2001-09-13	58.4	50.4333	Russia								MH783327	MH778404
Europe	MVK062	UWBM 74265	Prunella modularis	M	2001-09-13	58.4	50.4333	Russia								MH783328, MH783329	MH778405
Europe	MVK067	UWBM 74337	Prunella modularis	M	2001-09-13	58.4	50.4333	Russia								MH783331, MH783332	MH778407
Europe	MVK292	UWBM 74437	Prunella modularis	M	2002-09-13	58.4	50.4333	Russia								MH783333, MH783334
Europe	CBH0877	ZMMU	Prunella modularis	F	2004-08-14	58.39	50.44	Russia								KC759211	KC759280
Europe	CBH0884	ZMMU	Prunella modularis	F	2004-09-15	58.39	50.44	Russia								MH783227	MH778344
Europe	CBH0889	ZMMU	Prunella modularis	M	2004-08-23	58.39	50.44	Russia								MH783228, MH783229	MH778345
Europe	SGA1604	ZMMU	Prunella modularis	M	2011-08-12	60.7913	59.5549	Russia	MH783521, MH783522	MH783633, MH783634	MH783745, MH783746	MH783857, MH783858	MH783411, MH783412	MH783969, MH783970		MH783337, MH783338	MH778409	MH784189, MH784190	MH784299, MH784300
Europe	SVD4692	ZMMU	Prunella modularis	M	2011-08-12	60.7913	59.5549	Russia	MH783525, MH783526	MH783637, MH783638	MH783749, MH783750	MH783861, MH783862	MH783415, MH783416	MH783973, MH783974		MH783347, MH783348	MH778421	MH784193, MH784194	MH784303, MH784304
Europe	SVD4704	ZMMU	Prunella modularis	M	2011-08-12	60.7913	59.5549	Russia	MH783527, MH783528	MH783639, MH783640	MH783751, MH783752	MH783863, MH783864	MH783417, MH783418	MH783975, MH783976	MH784083, MH784084	MH783349, MH783350	MH778422	MH784195, MH784196	MH784305, MH784306
Europe	SVD4706	ZMMU	Prunella modularis	U	2011-08-12	60.7913	59.5549	Russia	MH783529, MH783530	MH783641, MH783642	MH783753, MH783754	MH783865, MH783866	MH783419, MH783420	MH783977, MH783978	MH784085, MH784086	KC759263	KC759315	MH784197, MH784198	MH784307, MH784308
Europe	SVD4720	ZMMU	Prunella modularis	U	2011-08-13	60.7913	59.5549	Russia	MH783531, MH783532	MH783643, MH783644	MH783755, MH783756	MH783867, MH783868	MH783421, MH783422	MH783979, MH783980	MH784087, MH784088	MH783351		MH784199, MH784200	MH784309, MH784310
Europe	SVD4755	ZMMU	Prunella modularis	M	2011-08-15	60.7913	59.5549	Russia	MH783533, MH783534	MH783645, MH783646	MH783757, MH783758	MH783869, MH783870	MH783423, MH783424	MH783981, MH783982	MH784089, MH784090	MH783352, MH783353	MH778423	MH784201, MH784202	MH784311, MH784312
Europe	AF407038	UMMZ A374	Prunella modularis	U				Great Britain									AF407038			Sorenson, M.D. & Payne, R.B. (2001) A single ancient origin of brood parasitism in African finches: implications for host-parasite coevolution. Evolution, 55, 2550-2567.
Europe	GU816839	NRM 976138	Prunella modularis	U				Sweden									GU816839
Caucasus	IUK0319	UWBM 61177	Prunella modularis	M	1998-06-18	44.7	38.8167	Russia								MH783254, MH783255	MH778360/KU859331
Caucasus	IUK0330	UWBM 61189	Prunella modularis	M	1998-06-19	44.7	38.8167	Russia								MH783256, MH783257	MH778361/KU859332
Caucasus	IVF0530	SDM	Prunella modularis	F	2004-06-03	43.9377	39.4803	Russia								MH783264	MH778365
Caucasus	SVD3244	USNM 640349	Prunella modularis	F	2004-06-02	43.9377	39.4803	Russia									MH778415
Caucasus	SVD3253	USNM 640358	Prunella modularis	M	2004-06-03	43.9377	39.4803	Russia									MH778416
Caucasus	SVD3276	USNM 640381	Prunella modularis	M	2004-06-04	43.9377	39.4803	Russia									MH778417
Caucasus	IUK0338	UWBM 61196	Prunella modularis	M	1998-06-22	44.1167	39.9	Russia								MH783258, MH783259	MH778362
Caucasus	IUK0344	UWBM 61203	Prunella modularis	M	1998-06-23	44.1167	39.9	Russia								MH783260, MH783261	MH778363/KU859333
Caucasus	SVD1782a	UWBM 61528	Prunella modularis	M	1998-07-19	44.1167	39.9	Russia									MH778412
Caucasus	EVN660	SDM	Prunella modularis	M	2004-06-10	44.1963	40.0795	Russia								MH783232, MH783233	MH778347
Caucasus	EVN665	SDM	Prunella modularis	F	2004-06-12	44.1963	40.0795	Russia								MH783234	MH778348
Caucasus	IVF0541	SDM	Prunella modularis	F	2004-06-11	44.1963	40.0795	Russia									MH778366
Caucasus	IVF0566	SDM	Prunella modularis	M	2004-06-17	44.1963	40.0795	Russia								MH783265, MH783266	MH778367
Caucasus	LYV068	FKSHAMR	Prunella modularis	F	2004-06-15	44.1963	40.0795	Russia	MH783499, MH783500	MH783611, MH783612	MH783723, MH783724	MH783835, MH783836	MH783389, MH783390	MH783947, MH783948	MH784059, MH784060	MH783280	MH778376	MH784167, MH784168	MH784277, MH784278
Caucasus	SVD3347	USNM 640452	Prunella modularis	M	2004-06-17	44.1963	40.0795	Russia									MH778418
Caucasus	IUK1888	USNM 639823	Prunella modularis	M	2004-06-12	44.2	40.08	Russia								MH783262, MH783263	MH778364
Caucasus	SVD2000	UWBM 64697	Prunella modularis	F	1999-06-21	43.7	40.35	Russia								MH783343	MH778413/KU859336
Caucasus	SVD2053	UWBM 64743	Prunella modularis	M	1999-07-04	43.8167	40.7167	Russia								MH783344, MH783345	MH778414/KU859337
Caucasus	KZ1945	YPM 101846	Prunella modularis	M	2006-06-24	43.9167	40.7833	Russia									MH778375
Caucasus	IVF0888	SDM	Prunella modularis	U	2008-07-10	44.04	40.88	Russia	MH783495, MH783496	MH783607, MH783608	MH783719, MH783720	MH783831, MH783832	MH783385, MH783386	MH783943, MH783944	MH784055, MH784056	MH783267		MH784163, MH784164	MH784273, MH784274
Caucasus	EAK066	ZMMU	Prunella modularis	M	2004-05-10	43.45	41.7833	Russia								MH783230, MH783231	MH778346
Caucasus	ZMMU112000	ZMMU	Prunella modularis	M	2000-01-28	43.7167	42.65	Russia								MH783359, MH783360	MH778425
Caucasus	MR0981	MNHB	Prunella modularis	F	2010-06-25	40.9382	44.4826	Armenia	MH783501, MH783502	MH783613, MH783614	MH783725, MH783726	MH783837, MH783838	MH783391, MH783392	MH783949, MH783950	MH784061, MH784062	MH783306	MH778392	MH784169, MH784170	MH784279, MH784280
Caucasus	MR1028	MNHB	Prunella modularis	M	2010-06-30	40.9382	44.4826	Armenia	MH783503, MH783504	MH783615, MH783616	MH783727, MH783728	MH783839, MH783840	MH783393, MH783394	MH783951, MH783952	MH784063, MH784064	MH783307, MH783308	MH778393	MH784171, MH784172	MH784281, MH784282
Caucasus	MR1029	MNHB	Prunella modularis	F	2010-06-30	40.9382	44.4826	Armenia	MH783505, MH783506	MH783617, MH783618	MH783729, MH783730	MH783841, MH783842	MH783395, MH783396	MH783953, MH783954	MH784065, MH784066	MH783309	MH778394	MH784173, MH784174	MH784283, MH784284
Caucasus	MR1030	MNHB	Prunella modularis	M	2010-06-30	40.9382	44.4826	Armenia	MH783507, MH783508	MH783619, MH783620	MH783731, MH783732	MH783843, MH783844	MH783397, MH783398	MH783955, MH783956	MH784067, MH784068	MH783310, MH783311	MH778395	MH784175, MH784176	MH784285, MH784286
Caucasus	MR1034	MNHB	Prunella modularis	F	2010-07-01	40.9382	44.4826	Armenia	MH783509, MH783510	MH783621, MH783622	MH783733, MH783734	MH783845, MH783846	MH783399, MH783400	MH783957, MH783958	MH784069, MH784070	MH783312	MH778396	MH784177, MH784178	MH784287, MH784288
Caucasus	MR1035	MNHB	Prunella modularis	M	2010-07-01	40.9382	44.4826	Armenia								MH783313, MH783314
Caucasus	MR1037	MNHB	Prunella modularis	F	2010-07-02	40.9382	44.4826	Armenia								MH783315	MH778397
Caucasus	MR1042	MNHB	Prunella modularis	F	2010-07-03	40.9382	44.4826	Armenia	MH783511, MH783512	MH783623, MH783624	MH783735, MH783736	MH783847, MH783848	MH783401, MH783402	MH783959, MH783960	MH784071, MH784072	MH783316	MH778398	MH784179, MH784180	MH784289, MH784290
Caucasus	MR1045	MNHB	Prunella modularis	M	2010-07-03	40.9382	44.4826	Armenia								MH783317, MH783318	MH778399
Caucasus	MR1055	MNHB	Prunella modularis	M	2010-07-06	40.9382	44.4826	Armenia								MH783319, MH783320	MH778400
Caucasus	C012426	TCWC none	Prunella modularis	M	2010-06-25	40.61	44.59	Armenia								MH783219, MH783220	MH778340
Caucasus	C012427	TCWC none	Prunella modularis	M	2010-06-26	40.61	44.59	Armenia								MH783221, MH783222	MH778341
Caucasus	C012434	TCWC none	Prunella modularis	M	2010-06-28	40.61	44.59	Armenia								MH783223, MH783224	MH778342
Caucasus	C012435	TCWC none	Prunella modularis	M	2010-06-28	40.61	44.59	Armenia								MH783225, MH783226	MH778343
Caucasus	IVF1040	SDM	Prunella modularis	M	2011-05-29	41.1264	44.9201	Armenia	MH783497, MH783498	MH783609, MH783610	MH783721, MH783722	MH783833, MH783834	MH783387, MH783388	MH783945, MH783946	MH784057, MH784058	MH783268, MH783269	MH778368	MH784165, MH784166	MH784275, MH784276
Caucasus	SVD4935	SDM	Prunella modularis	M	2012-07-16	39.07	46.27	Armenia	MH783513, MH783514	MH783625, MH783626	MH783737, MH783738	MH783849, MH783850	MH783403, MH783404	MH783961, MH783962	MH784073, MH784074	MH783354, MH783355	MH778424	MH784181, MH784182	MH784291, MH784292
ocularis	IVF1092	SDM	Prunella ocularis	M	2011-06-13	40.4105	44.246	Armenia								KC759226, KC759227	KC759291
ocularis	IVF1093	SDM	Prunella ocularis	M	2011-06-13	40.4105	44.246	Armenia								KC759228, KC759229	KC759292
ocularis	IVF1094	SDM	Prunella ocularis	M	2011-06-13	40.4105	44.246	Armenia								KC759230, KC759231	KC759293
ocularis	IVF1095	SDM	Prunella ocularis	M	2011-06-13	40.4105	44.246	Armenia								KC759232, KC759233	KC759294
ocularis	IVF1096	SDM	Prunella ocularis	M	2011-06-13	40.4105	44.246	Armenia	MH783581, MH783582	MH783693, MH783694	MH783805, MH783806	MH783917, MH783918	MH783471, MH783472	MH784029, MH784030	MH784137, MH784138	KC759234, KC759235	KC759295	MH784249, MH784250	MH784359, MH784360
ocularis	IVF1101	SDM	Prunella ocularis	M	2011-06-16	40.4105	44.246	Armenia	MH783583, MH783584	MH783695, MH783696	MH783807, MH783808	MH783919, MH783920	MH783473, MH783474	MH784031, MH784032	MH784139, MH784140	KC759236, KC759237	KC759296		MH784361, MH784362
atrogularis	SGA1414	ZMMU	Prunella atrogularis huttoni	M	2011-06-19	51.04	85.64	Russia	MH783475, MH783476	MH783585, MH783586	MH783697, MH783698	MH783809, MH783810	MH783363, MH783364	MH783921, MH783922	MH784033, MH784034	KC759252, KC759253	KC759309	MH784141, MH784142	MH784251, MH784252
atrogularis	SGA1419	ZMMU	Prunella atrogularis huttoni	M	2011-06-20	51.04	85.64	Russia	MH783477, MH783478	MH783587, MH783588	MH783699, MH783700	MH783811, MH783812	MH783365, MH783366	MH783923, MH783924	MH784035, MH784036	KC759254, KC759255	KC759310	MH784143, MH784144	MH784253, MH784254
atrogularis	GAV210	UWBM 46587	Prunella atrogularis huttoni	M	1993-06-09	51.0345	85.6495	Russia								KC759219, KC759220	KC759285
									55	56	56	56	56	56	54	115	126	55	56
Institutions
FKSHAMR	Felitsyn's Krasnodar State Historical and Archaeological Museum-Reserve, Krasnodar, Russia
CIBIO	Research Centre in Biodiversity and Genetic Resources, Vairao, Portugal
MCCI	Museo civico di storia naturale, Carmagnola, Italy
TCWC	Biodiversity Research and Teaching Collections at Texas A&M University, USA
MNHB	Natural History Museum, Belgrade, Serbia
YPM	Yale Peabody Museum of Natural History
USNM	National Museum of Natural History, Smithsonian Institution, USA
ZMMU	Zoological Museum of Moscow University, Russia
UWBM	Burke Museum of Natural History and Culture
UMMZ	University of Michigan Museum of Zoology
NRM	Swedish Museum of Natural History, Sweden
SDM	State Darwin Museum, Russia
